# Supplementary material for: Protein splicing of a recombinase intein induced by ssDNA and DNA damage
Source: PubMed Central journal article supplement — Genes Dev. 2016 Dec 15;30(24):2663–8. doi: 10.1101/gad.289280.116 (PMC5238726; doi:10.1101/gad.289280.116), 2016-12-15

## **Supplemental Materials**

### **Protein splicing of a recombinase intein induced by single-stranded DNA and DNA damage**

Christopher W. Lennon, Matthew Stanger, and Marlene Belfort\*

\*Correspondence to Marlene Belfort ([mbelfort@albany.edu](mailto:mbelfort@albany.edu)).

#### **This PDF includes:**

**Supplemental Figures 1-6**

**Supplemental Figure Legends**

**Supplemental Tables 1-3**

**Supplemental Reference**

## Supplemental Figure Legends

**Supplemental Figure 1:** Characteristics of ssDNA-stimulated RadA splicing. *(A)* ATP does not accelerate  $\Delta$ N-RadA splicing in the presence or absence of ssDNA. Reaction mixtures were incubated at 63°C for 10 min, separated by SDS-PAGE, and stained with Coomassie. See Figure 1A for band assignment. Below, bar graph quantitation of the gel in panel A. *(B)* Full-length RadA splices in response to ssDNA. Samples were treated at 63°C for the indicated times and processed as in panel A. Below, bar graph quantitation of the gel in panel B. *(C)* Splicing is not stimulated by dsDNA. M13mp18 ssDNA stimulates splicing, while M13mp18 dsDNA (replicative form 1), which has the same sequence, does not. Below, bar graph quantitation of the gel in panel C. *(D)* Increased secondary structure of ssDNA decreases RadA splicing stimulation. Increasing MgCl<sub>2</sub> concentration decreases the effect of ssDNA but not of splicing in the absence of ssDNA. Below, bar graph quantitation of the gel in panel D. Data in all panels are representative of at least 3 experiments.

**Supplemental Figure 2:** RadA Binding to ssDNA. *(A)* RadA-R503A is defective in ssDNA binding.  $\Delta$ N-RadA and the  $\Delta$ N-RadA-R503A mutant bind to ssDNA, with  $\Delta$ N-RadA-R503A showing ~3-fold lower affinity. Both  $\Delta$ N-RadA  $\Delta$ N-RadA-R503A were spliced prior to incubation. The concentration of ssDNA is 5  $\mu$ M binding sites (3 bases per RadA binding site; Seitz et al. 1998) and concentrations of RadA are listed above each lane. *(B)* Free RadA intein does not bind to ssDNA. The concentration of ssDNA is 16.7  $\mu$ M binding sites and concentrations of the free intein are listed above each lane. A higher concentration of ssDNA was used in panel B compared panel A

and Fig. 1a to promote interaction. Samples in panels A and B were incubated at 63°C for 60 min and separated on a 1% agarose gel. (C) Apparent  $K_d$  determination. The fraction of ssDNA bound at different RadA protein concentrations from 3 independent binding experiments for  $\Delta N$ -RadA,  $\Delta N$ -RadA-AA (trapped precursor; see Fig. 1B) and  $\Delta N$ -RadA-R503A. See Materials and Methods for details on curve fitting.

**Supplemental Figure 3:** RadA intein in foreign exteins is unaffected by ssDNA. (A) RadA splicing in the MIG construct, where maltose binding protein is the N-extein and green fluorescent protein the C-extein. Following expression from pMIG-RadAi at 30°C for 1 h and cell lysis, lysate was incubated at 23°C with or without M13mp18 ssDNA for indicated times, separated by SDS-PAGE, and visualized using in-gel fluorescence. P, precursor conformers; LE, ligated exteins. (B) Quantitation of panel A based on fluorescence. Dashed line is without ssDNA, solid line is with ssDNA.

**Supplemental Figure 4:** Concentration and temperature-dependent RadA splicing. (A) Splicing stimulation by ssDNA is greater at reduced protein concentration. Reactions were incubated at 63°C for 10 min. Below, quantitation of the gel in panel A. (B) ssDNA accelerates  $\Delta N$ -RadA splicing at 37°C. Reactions were incubated at 37°C for indicated times, and processed as above. Below, quantitation of the gel in panel B. Data in all panels are representative of at least 3 experiments.

**Supplemental Figure 5:** RadA splicing in the absence of DNA damage and following UV treatment in SOS<sup>-</sup> and SOS<sup>+</sup> strains. (A) RadA splicing in absence of DNA damage in SOS<sup>-</sup> and SOS<sup>+</sup> strains. RadA was expressed in *E. coli* at 37°C in *lexA*<sup>+</sup> and *lexA3* in the absence of external stress (Supplemental table 3 for genotypes). Precursor (P) and ligated exteins (LE) were isolated by his-tag mediated pull-down, separated by SDS-PAGE, stained with Coomassie, and the amounts of P and LE were determined by densitometry. Precursor resolves as 2 bands when expressed at 37°C as previously described (Topilina et al. 2015b). (B) Quantitation of splicing in panel A. (C) Splicing in SOS<sup>+</sup> strains is higher than in SOS<sup>-</sup> after UV treatment. Expression of RadA in *recA*<sup>+</sup>/*recA*<sup>-</sup> and *lexA*<sup>+</sup>/*lexA3* strain pairs was measured 2 h after UV treatment. Samples were isolated and analyzed as in panel A.

**Supplemental Figure 6:** DNA-binding residue required for maximal ssDNA splicing enhancement. (A) *Pho* RadA residue R503 is highly conserved in nature. The alignment was generated using Clustal Omega. (B) RadA precursor model showing pertinent features. Pymol was employed to generate the image using the model of precursor (Topilina et al. 2015b). N-extein (residues 1-115 omitted), blue; Intein, red; C-extein, green; L1 and L2, yellow; Intein C1 (C153), rose spacefill; C-extein T+1 (T325), lime green spacefill; R503, dark green spacefill (C). ΔN-RadA-R503A splicing stimulation by ssDNA is reduced. Reactions were incubated at 63°C and analyzed as in Figure 2. (D) Kinetics of ΔN-RadA-R503A splicing stimulation. Plots are in the presence (filled circles) and absence (open circles) of ssDNA. Error was calculated as the standard deviation from 3 independent experiments. When error bars are

not shown, error is less than the size of the symbol. Also displayed for reference are the curves of  $\Delta N$ -RadA splicing with and without ssDNA from Fig. 2B to 180 min (gray).

**Supplemental Table 1. List of oligonucleotides used in this study**

| Oligo ID | Sequence (5' → 3')                                        | Application                        |
|----------|-----------------------------------------------------------|------------------------------------|
| IDT3557  | CCCGGATCCGATTGGAAGGATCTCAACTGGAAGCAAAAGTTTAG              | pΔN-RadAi and pΔN-RadAi-AA cloning |
| IDT3558  | CCCGGATCCGGAAAGCATTGGAAGGATCTCAACTGGAAGC                  | pΔN-RadAi and pΔN-RadAi-AA cloning |
| IDT3674  | GAAGGGTAAGGGAGGAAAGGCGGTAGCTAGGTTAATAGAT                  | pΔN-RadAi R503A mutagenesis        |
| IDT3675  | ATCTATTAACCTAGCTACCGCCTTTCCTCCCTTACCCTTC                  | pΔN-RadAi R503A mutagenesis        |
| IDT4172  | CCTGCCTTGTGGCAGCTTCAAGAATTCGGTAGTGGGAAGTGCTTTGCTAGG       | pXI-INT-RadA cloning               |
| IDT4173  | GTAAACGACGCCAGTGCCAAGCTTTTATTAAGCATGGAGAACAAGTCCATTGGGAGC | pXI-INT-RadA cloning               |

**Supplemental Table 2. List of plasmids used in this study**

| Plasmid         | Comments                                                                                                                                                                     | Source                |
|-----------------|------------------------------------------------------------------------------------------------------------------------------------------------------------------------------|-----------------------|
| pΔN-RadAi       | For expression of intein containing <i>Pho</i> RadA lacking residues 1-115 with an amino-terminal his-tag lacking cloned into <i>Bam</i> HI/ <i>Xho</i> I sites of pET45b(+) | Present study         |
| pΔN-RadAi-AA    | C153A, N324A splicing inactive mutant of pΔN-RadAi                                                                                                                           | Present study         |
| pΔN-RadAi-R503A | R503A mutant of pΔN-RadAi                                                                                                                                                    | Present study         |
| pXI-INT-RadA    | <i>Pho</i> RadA Intein with chitin binding domain; no RadA extein sequence                                                                                                   | Present study         |
| pMIG-RadAi      | <i>Pho</i> RadA intein with short extein sequences cloned between MBP and GFP                                                                                                | Topilina et al. 2015b |
| pFL-RadAi       | For expression of full-length intein containing <i>Pho</i> RadA precursor with an amino-terminal his-tag                                                                     | Topilina et al. 2015b |
| pFL-RadAi-AA    | C153A, N324A splicing inactive mutant of pFL-RadAi-AA                                                                                                                        | Topilina et al. 2015b |

**Supplemental Table 3. List of *E. coli* strains used in this study**

| Strain             | Genotype                                                                                                                                                                 | Source                             |
|--------------------|--------------------------------------------------------------------------------------------------------------------------------------------------------------------------|------------------------------------|
| AB1157(DE3)        | <i>F' thr1 leuB6 Δ(gpt-proA)2 hisG4 argE3 thi-1 ara-14 lacY1 galK2 xyl-5 mtl-1 rpsL31 tsx-33 supE44 (rac) λ(DE3)</i>                                                     | Smith et al. 2005                  |
| AB1157lexA3        | <i>F' thr1 leuB6 Δ(gpt-proA)2 hisG4 argE3 thi-1 ara-14 lacY1 galK2 xyl-5 mtl-1 rpsL31 tsx-33 supE44 (rac) lexA3zja::Tn10 (Tet<sup>r</sup>)</i>                           | Richard P. Cunningham, pers. comm. |
| AB1157lexA3(DE3)   | <i>F' thr1 leuB6 Δ(gpt-proA)2 hisG4 argE3 thi-1 ara-14 lacY1 galK2 xyl-5 mtl-1 rpsL31 tsx-33 supE44 (rac) λ(DE3) lexA3zja::Tn10 (Tet<sup>r</sup>)</i>                    | Present study                      |
| ArcticExpress(DE3) | <i>F<sup>-</sup> ompT hsdS<sub>B</sub>(r<sub>B</sub><sup>-</sup> m<sub>B</sub><sup>-</sup>) dcm gal λ(DE3) endA Hte [cpn10 cpn60 Gent<sup>r</sup>] (Tet<sup>r</sup>)</i> | Agilent                            |
| BL21(DE3)          | <i>F<sup>-</sup> ompT hsdS<sub>B</sub>(r<sub>B</sub><sup>-</sup> m<sub>B</sub><sup>-</sup>) gal dcm (DE3)</i>                                                            | Novagen                            |
| BLR(DE3)           | <i>F<sup>-</sup> ompT hsdS<sub>B</sub>(r<sub>B</sub><sup>-</sup> m<sub>B</sub><sup>-</sup>) gal dcm (DE3) Δ(srl-recA)306::Tn10 (Tet<sup>r</sup>)</i>                     | Novagen                            |
| JM109              | <i>F' traD36 proA<sup>+</sup>B<sup>+</sup> lacI<sup>q</sup> Δ(lacZ)M15/ Δ(lac-proAB) glnV44 e14<sup>-</sup> gyrA96 recA1 relA1 endA1 thi hsdR17</i>                      | New England Biolabs                |

### Supplemental Reference

Smith D, Zhong J, Matsuura M, Lambowitz AM, Belfort M. 2005. Recruitment of host functions suggests a repair pathway for late steps in group II intron retrohoming. *Genes Dev* **19**: 2477-2847.

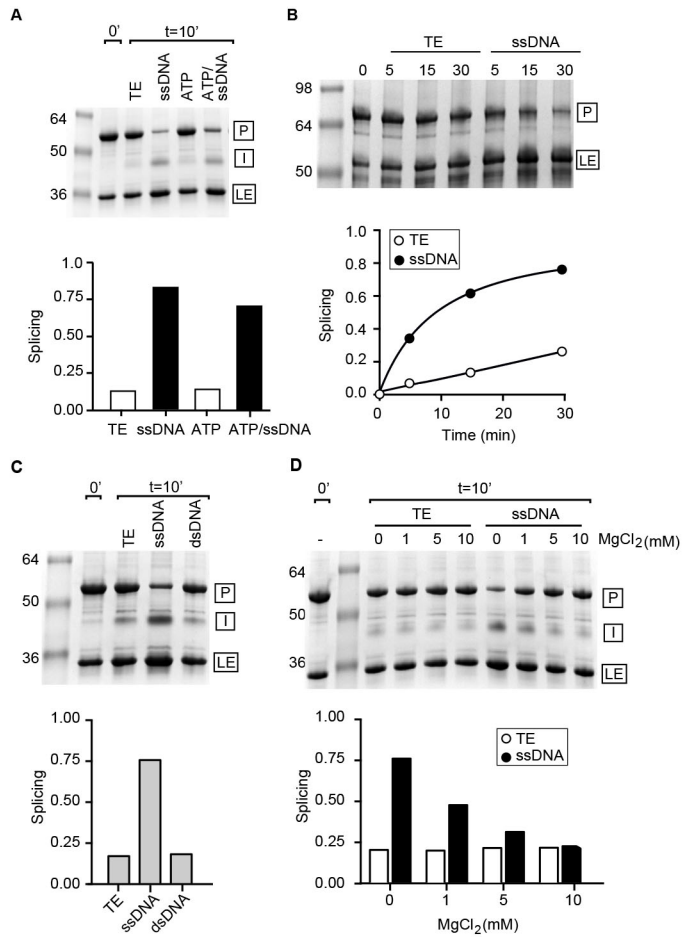

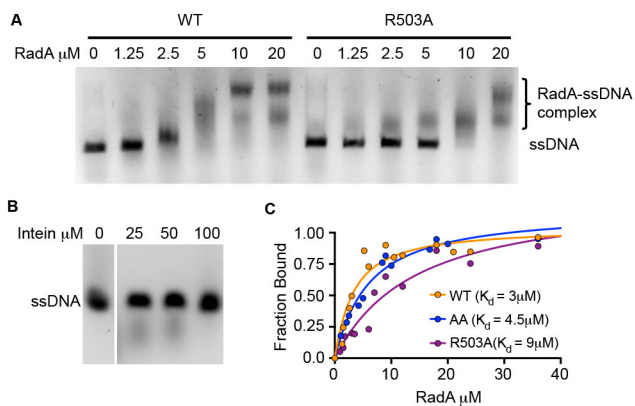

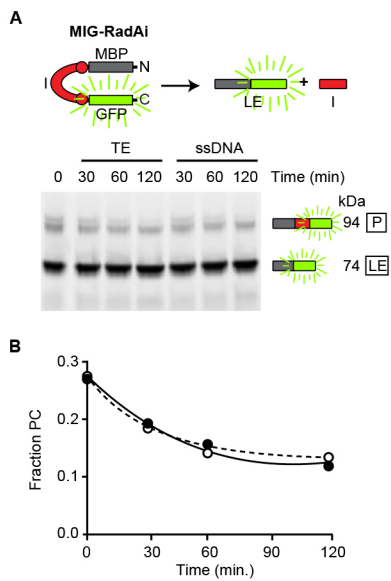

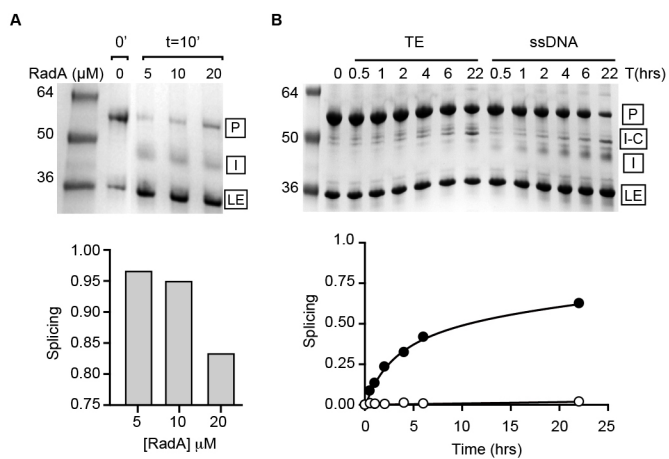

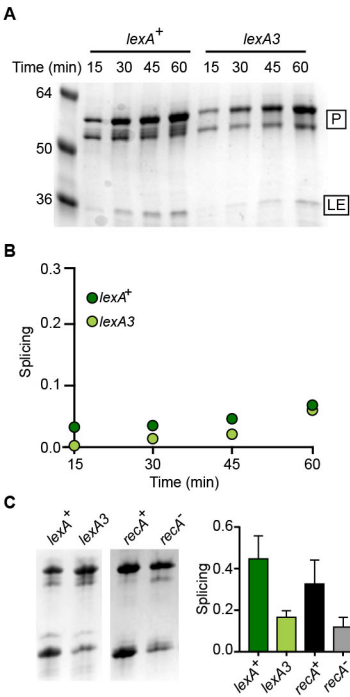

A

|                     |       |                |                 |
|---------------------|-------|----------------|-----------------|
| <i>P.horikoshii</i> | RadA  | 494-YLRKGGKGGK | RLIDAPHLPEG-513 |
| <i>P.furiosus</i>   | RadA  | 314-YLRKGGKGGK | RIARLIDAPHL-333 |
| <i>M.voltae</i>     | RadA  | 287-FVRKGGKGDK | RVAKLYDSPHL-306 |
| <i>S.cerevisiae</i> | Rad51 | 359-GFKKGGKGCQ | RLCKVVDSPCL-378 |
| <i>H.sapien</i>     | Rad51 | 301-YLRKGRGET  | RIKLIYDSPCL-320 |

B

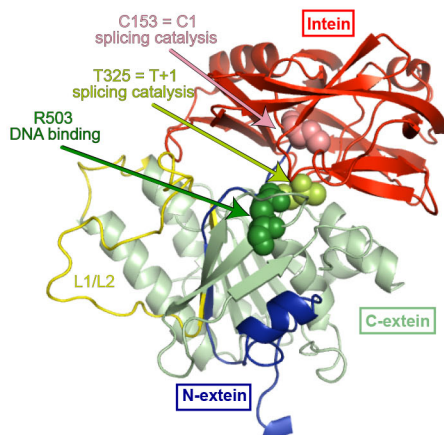

C

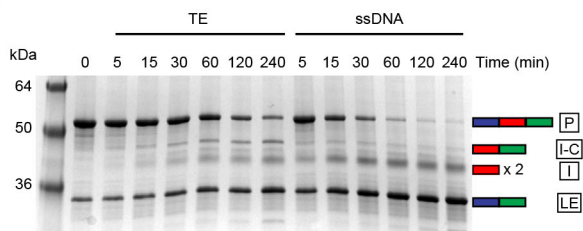

D

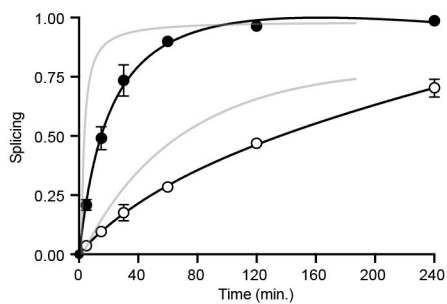

Supplement: supp_gad.289280.116_Supplemental_Data.pdf [file supp_gad.289280.116_Supplemental_Data.pdf]
